# Supplementary material
Source: PubMed Central journal article supplement (PMC5481818)
Supplement: jf7b01897_si_001.pdf [file jf7b01897_si_001.pdf]

## Supporting Information for Publication

**Table S1.** Quantitation of Phenolics (mM) in Pools 2 and 3 During Incubations With Endogenous Oxidases from 3<sub>m</sub> and 8<sub>m</sub> Leaves.

| no. | [M-H] <sup>-</sup> | Compound                                    | Pool 2 (mM)                   |                                |                               |                                | Pool 3 (mM)                   |                                |                               |                                |
|-----|--------------------|---------------------------------------------|-------------------------------|--------------------------------|-------------------------------|--------------------------------|-------------------------------|--------------------------------|-------------------------------|--------------------------------|
|     |                    |                                             | 3 <sub>m</sub> t <sub>0</sub> | 3 <sub>m</sub> t <sub>20</sub> | 8 <sub>m</sub> t <sub>0</sub> | 8 <sub>m</sub> t <sub>20</sub> | 3 <sub>m</sub> t <sub>0</sub> | 3 <sub>m</sub> t <sub>20</sub> | 8 <sub>m</sub> t <sub>0</sub> | 8 <sub>m</sub> t <sub>20</sub> |
| 1   | 215                | Caffeic acid derivative                     | 0.03                          | 0.02                           | 0.02                          | 0.03                           | 0.01                          | 0.064                          | 0                             | 0.02                           |
| 2   | 341                | Caffeic acid <i>O</i> -β-hexoside           | 0.10                          | 0.12                           | 0.11                          | 0.11                           | 0.03                          | 0.08                           | 0.05                          | 0.08                           |
| 4   | 773                | Caffeoyl-spermine-hexosyl ester             | 0.12                          | 0.09                           | 0.12                          | 0.10                           | 0.05                          | 0.10                           | 0.04                          | 0.04                           |
| 6   | 383                | Caffeic acid hexosyl-acetyl ester           | 0.01                          | 0.00                           | 0.01                          | 0.01                           | 0.00                          | 0.00                           | 0.00                          | 0.00                           |
| 7   | 297                | 2 <i>O</i> -Caffeoyl threonic acid          | 0.94                          | 0.38                           | 1.01                          | 0.42                           | 0.11                          | 0.04                           | 0.54                          | 0.18                           |
| 11  | 261                | Dihydrocaffeic acid sulfate-ester           | 0.01                          | 0.00                           | 0.04                          | 0.01                           | 0.00                          | 0.00                           | 0.03                          | 0.00                           |
| 18  | 487                | Caffeoyl-feruoyltartaric acid               | 0.07                          | 0.00                           | 0.12                          | 0.08                           | 0.00                          | 0.00                           | 0.05                          | 0.01                           |
| 12  | 439                | Unidentified sinapic acid derivative        | 0.15                          | 0.07                           | 0.14                          | 0.00                           | 0.00                          | 0.00                           | 0.00                          | 0.05                           |
| 21  | 651                | Sinapic acid <i>O</i> -hexosyl derivative   | 0.85                          | 0.50                           | 0.92                          | 0.7                            | 0.26                          | 0.19                           | 0.33                          | 0.25                           |
| 24  | 445                | Sinapic acid <i>O</i> -hexosyl ester        | 2.80                          | 1.00                           | 2.79                          | 1.09                           | 0.09                          | 0.00                           | 0.08                          | 0.00                           |
| 29  | 489                | Sinapic acid derivative                     | 0.67                          | 0.23                           | 0.78                          | 0.33                           | 0.53                          | 0.06                           | 0.64                          | 0.09                           |
| 17  | 305                | Dihydro- <i>p</i> -coumaric acid derivative | 0.06                          | 0.00                           | 0.07                          | 0.00                           | 0.00                          | 0.00                           | 0.01                          | 0.00                           |
| 22  | 337                | 5- <i>p</i> -Coumaroylquinic acid           | 0.62                          | 0.52                           | 0.64                          | 0.10                           | 0.02                          | 0.01                           | 0.04                          | 0.01                           |
| 25  | 337                | 4- <i>p</i> -Coumaroylquinic acid           | 0.22                          | 0.20                           | 0.22                          | 0.07                           | 1.42                          | 0.00                           | 1.42                          | 0.00                           |
| 20  | 621                | Ferulic acid <i>O</i> -hexosyl derivative   | 0.26                          | 0.10                           | 0.27                          | 0.09                           | 0.03                          | 0.01                           | 0.03                          | 0.04                           |
| 23  | 487                | Ferulic acid <i>O</i> -pento-hexoside       | 0.50                          | 0.36                           | 0.51                          | 0.36                           | 0.02                          | 0.01                           | 0.03                          | 0.01                           |
| 26  | 445                | Ferulic acid <i>O</i> -hexosyl derivative   | 0.94                          | 0.38                           | 1.01                          | 0.42                           | 0.11                          | 0.04                           | 0.54                          | 0.18                           |
| 27  | 355                | Ferulic acid-hexosyl ester                  | 0.60                          | 0.59                           | 0.67                          | 0.66                           | 0.14                          | 0.03                           | 0.20                          | 0.05                           |
| 28  | 517                | Ferulic acid-hexosyl ester                  | 1.52                          | 0.99                           | 1.56                          | 1.13                           | 0.79                          | 0.62                           | 0.83                          | 0.83                           |
| 30  | 443                | Ferulic acid derivative                     | 0.63                          | 0.40                           | 0.63                          | 0.50                           | 0.08                          | 0.07                           | 0.08                          | 0.07                           |
| 31  | 473                | Ferulic acid derivative                     | 0.38                          | 0.30                           | 0.44                          | 0.32                           | 0.03                          | 0.03                           | 0.10                          | 0.01                           |
| 32  | 625                | Quercetin <i>O</i> -dihexoside              | 0.03                          | 0.02                           | 0.03                          | 0.04                           | 0.52                          | 0.53                           | 0.53                          | 0.50                           |
| 33  | 593                | 4'' <i>O</i> -Hexosylvitexin                | 0.03                          | 0.00                           | 0.03                          | 0.00                           | 0.35                          | 0.00                           | 0.35                          | 0.00                           |
| 34  | 563                | Vitexin <i>O</i> -pentosyl derivative       | 0.02                          | 0.01                           | 0.03                          | 0.01                           | 0.65                          | 0.35                           | 0.65                          | 0.24                           |
| 35  | 431                | Vitexin                                     | 0.02                          | 0.01                           | 0.02                          | 0.01                           | 0.79                          | 0.45                           | 0.78                          | 0.52                           |
| 36  | 635                | Vitexin <i>O</i> -hexoside                  | 0.04                          | 0.01                           | 0.07                          | 0.02                           | 1.24                          | 1.10                           | 1.27                          | 1.28                           |
| 38  | 679                | Hexosyl-malonylvitexin                      | 0.06                          | 0.02                           | 0.07                          | 0.03                           | 1.28                          | 1.19                           | 1.29                          | 1.27                           |
| 41  | 473                | Vitexin acetyl derivative                   | 0.00                          | 0.04                           | 0.12                          | 0.02                           | 1.62                          | 1.21                           | 1.73                          | 1.24                           |
| 37  | 639                | Isorhamnetin <i>O</i> -dihexoside           | 0.00                          | 0.00                           | 0.01                          | 0.01                           | 0.03                          | 0.02                           | 0.03                          | 0.03                           |
| 39  | 609                | Isorhamnetin derivative                     | 0.12                          | 0.03                           | 0.07                          | 0.00                           | 0.48                          | 0.00                           | 0.43                          | 0.35                           |

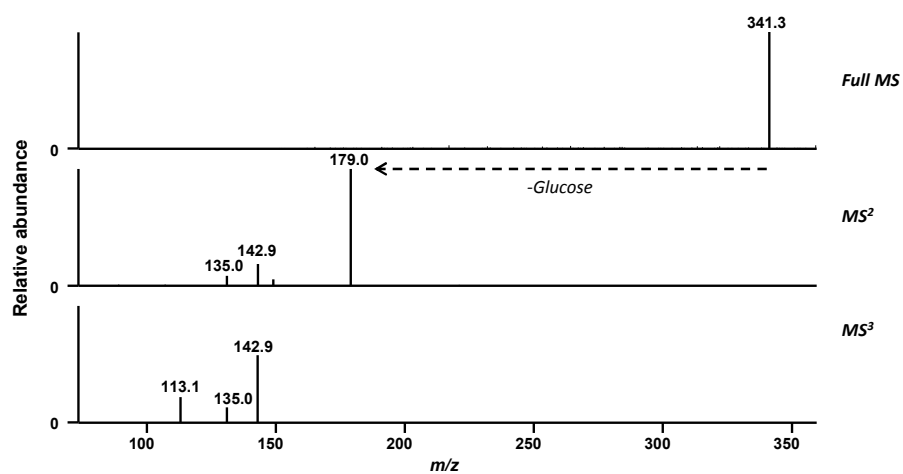

**Figure S1** Mass fragmentation spectrum of caffeic acid *O*- $\beta$ -hexoside (2)

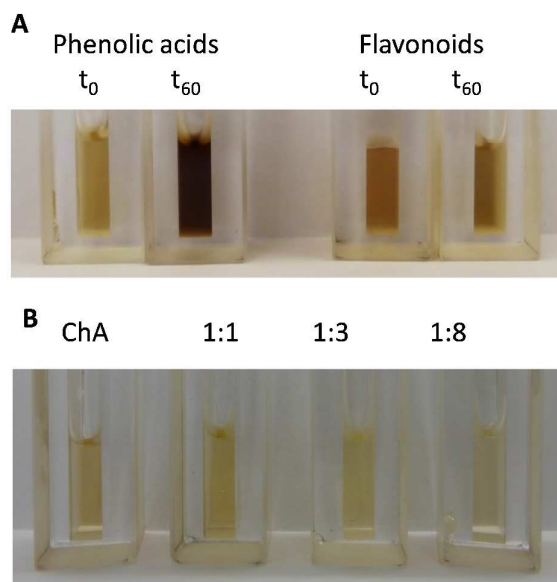

**Figure S2.** Colors of (A) pool 2 (phenolic acids) and 3 (flavonoids) before ( $t_0$ ) and after 60 min ( $t_{60}$ ) incubation with dialyzed enzyme extract. (B) Colors of chlorogenic acid (ChA) after 60 min incubation with mushroom tyrosinase at different molar ratios of ferulic acid:chlorogenic acid.

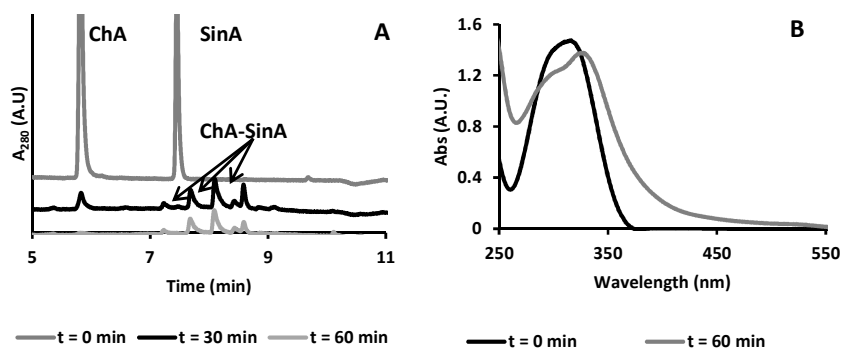

**Figure S3.** (A) RP-UHPLC-PDA traces of chlorogenic acid (ChA) (0.1 mM) and sinapic acid (SinA) (0.1 mM) incubated with mushroom tyrosinase at several time points and (B) absorbance spectra of the reaction mixtures before and after 60 min incubation.

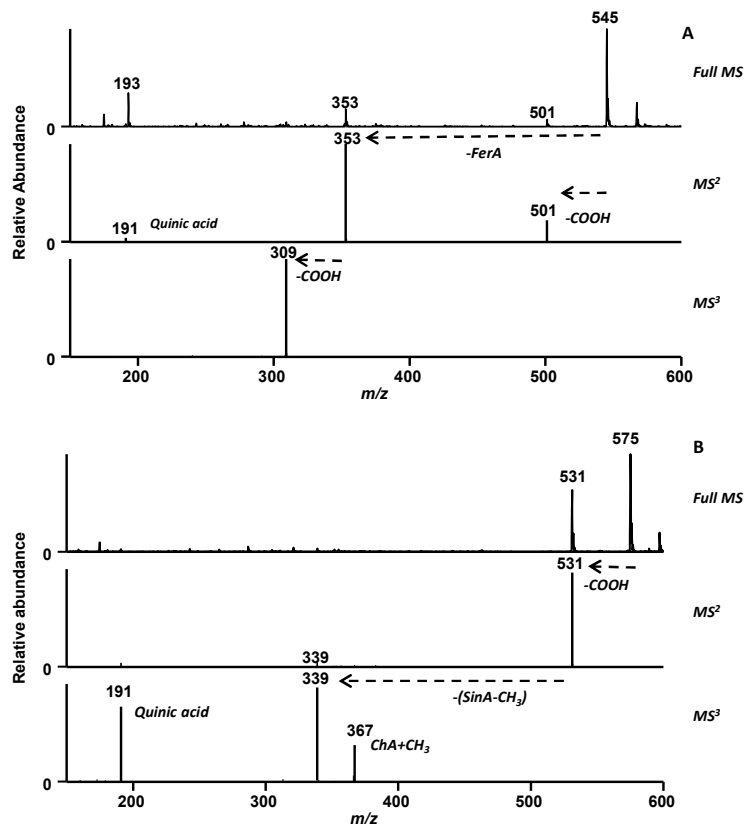

**Figure S4.** (A) Mass fragmentation spectra of chlorogenic acid-ferulic acid and (B) chlorogenic acid-sinapic acid.
